# Supplementary material for: Effective Reduction of Volumetric Thermal Expansion of Aromatic Polyimide Films by Incorporating Interchain Crosslinking
Source: Polymers (Basel). 2018 Jul 11;10(7):761. doi: 10.3390/polym10070761 (PMC6403670; doi:10.3390/polym10070761)
Supplement: Supplementary file 1 [file polymers-10-00761-s001.pdf]

# Effective Reduction of Volumetric Thermal Expansion of Aromatic Polyimide Films by Incorporating Inter-chain Crosslinking

Shinji Ando \*, Mari Harada, Tomohiro Okada, and Ryohei Ishige

Department of Chemical Science and Engineering, Tokyo Institute of Technology,  
Ookayama 2-12-1-E4-5, Meguro-ku, Tokyo, 152-8552, Japan

\* Correspondence: sando@polymer.titech.ac.jp; Tel.: +81-3-5734-2137; Fax: +81-3-5734-2889

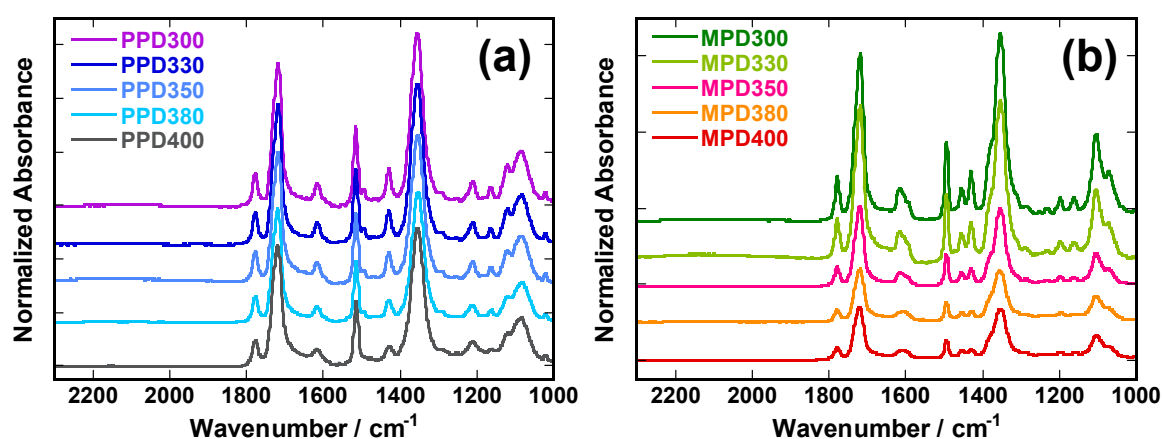

Figure S1. Mid-IR-ATR spectra of (a) PPD-PI and (b) MPD-PI films cured at different temperatures.

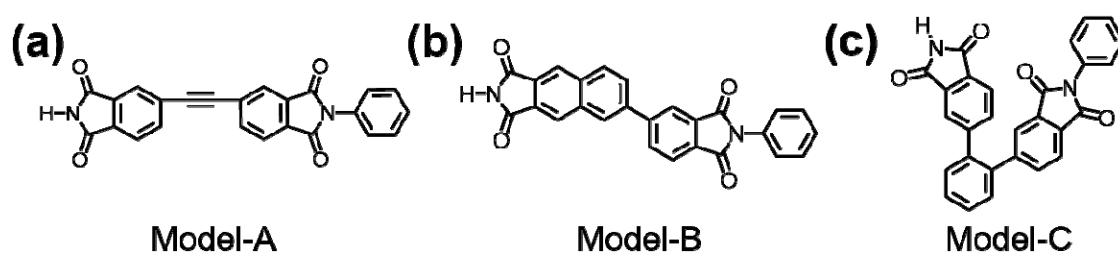

**Scheme S1.** Structures of model compounds used for the DFT calculation to estimate the packing coefficients before and after crosslink reactions. (a) Model-A (before crosslinking) and (b, c) Model-B and -C (after crosslink reactions which formed a fused naphthalene or a biphenyl structures).

• **Calculation of intrinsic birefringence ( $\Delta n^0$ ) using anisotropic molecular polarizability ( $\alpha_{//}$  and  $\alpha_{\perp}$ )**

**Table S1** shows the molecular polarizabilities ( $\alpha_{11}$ ,  $\alpha_{22}$ ,  $\alpha_{33}$ ), intrinsic refractive indices parallel and perpendicular to the molecule long axis ( $n_{//}^0$ ,  $n_{\perp}^0$ ), the intrinsic birefringence ( $\Delta n^0$ ) and van der Waals volume ( $V_{\text{vdw}}$ ) of Model-A, -B, and -C. The values of  $\alpha_{11}$ ,  $\alpha_{22}$ ,  $\alpha_{33}$  were obtained from the DFT calculations, and those of  $n_{//}^0$ ,  $n_{\perp}^0$  were obtained based on the following equations by using experimental average refractive index ( $n_{\text{av}}$ ), in which the  $n_{\text{av}}$  of Model-A, -B, and -C were assumed as same as that of PPD-300.

$$n_{//}^0 = \left[ \frac{\alpha_{//}}{\alpha_{\text{av}}} (n_{\text{av}}^2 - 1) + 1 \right]^{\frac{1}{2}} \quad (\text{S1})$$

$$n_{\perp}^0 = \left[ \frac{\alpha_{\perp}}{\alpha_{\text{av}}} (n_{\text{av}}^2 - 1) + 1 \right]^{\frac{1}{2}} \quad (\text{S2})$$

$$\alpha_{//} = \alpha_{11}, \alpha_{\perp} = \frac{\alpha_{22} + \alpha_{33}}{2}, \alpha_{\text{av}} = \frac{\alpha_{11} + \alpha_{22} + \alpha_{33}}{3} \quad (\text{S3})$$

The  $\Delta n^0$  is given by

$$\Delta n^0 = n_{//}^0 - n_{\perp}^0 \quad (\text{S4})$$

**Table S1.** Calculated values of average molecular polarizability ( $\alpha_{\text{av}}$ ), principal values of polarizability tensor ( $\alpha_{11}$ ,  $\alpha_{22}$ ,  $\alpha_{33}$ ), van der Waals volume ( $V_{\text{vdw}}$ ),  $\alpha_{\text{av}}/V_{\text{vdw}}$  values, intrinsic refractive indices parallel and perpendicular to the molecule long axis ( $n_{//}^0$ ,  $n_{\perp}^0$ ), and intrinsic birefringence ( $\Delta n^0$ ) of Model-A, -B, and -C. The calculation procedures were reported elsewhere.[13]

| Model | $\alpha_{\text{av}}$<br>( $\text{\AA}^3$ ) | ( $\alpha_{11}$ ,<br>( $\text{\AA}^3$ ) | $\alpha_{22}$ ,<br>( $\text{\AA}^3$ ) | $\alpha_{33}$ )<br>( $\text{\AA}^3$ ) | $V_{\text{vdw}}$<br>( $\text{\AA}^3$ ) | $\alpha_{\text{av}}/V_{\text{vdw}}$ | $n_{\text{av}}^0$ | $n_{//}^0$ | $n_{\perp}^0$ | $\Delta n^0$ |
|-------|--------------------------------------------|-----------------------------------------|---------------------------------------|---------------------------------------|----------------------------------------|-------------------------------------|-------------------|------------|---------------|--------------|
| A     | 52.7                                       | 90.0                                    | 44.6                                  | 23.3                                  | 330.1                                  | 0.160                               | 1.743             | 2.118      | 1.515         | 0.602        |
| B     | 54.5                                       | 90.2                                    | 47.0                                  | 26.3                                  | 350.6                                  | 0.155                               | 1.715             | 2.052      | 1.514         | 0.539        |
| C     | 53.5                                       | 68.2                                    | 53.3                                  | 39.0                                  | 378.8                                  | 0.141                               | 1.633             | 1.767      | 1.560         | 0.208        |

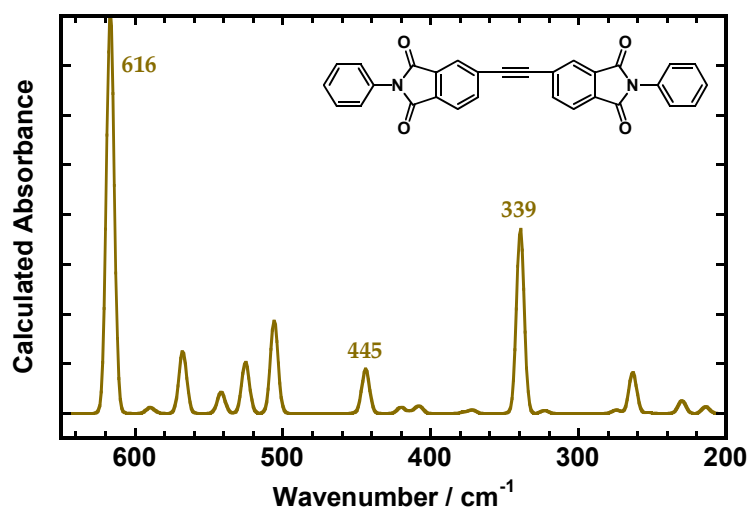

Figure S2. Calculated far-IR absorption spectra of the model depicted in Fig. 3(a).

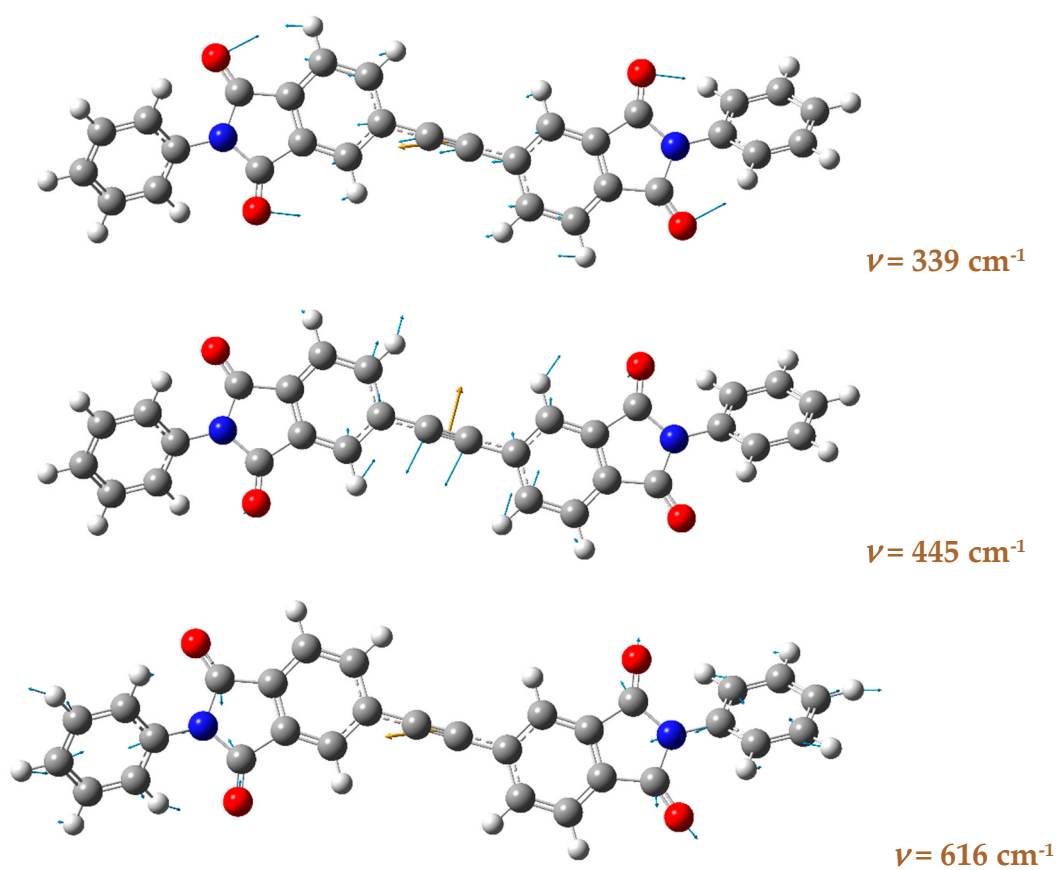

Figure S3. Calculated vibration modes of representative far-IR absorption peaks of the model depicted in Fig. 3(a).

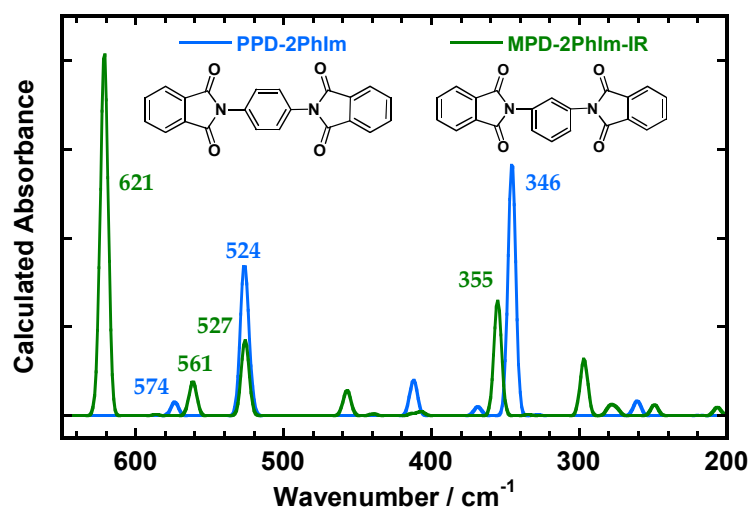

**Figure S4.** Calculated far-IR absorption spectra of model compounds for PPD-PI and MPD-PI.

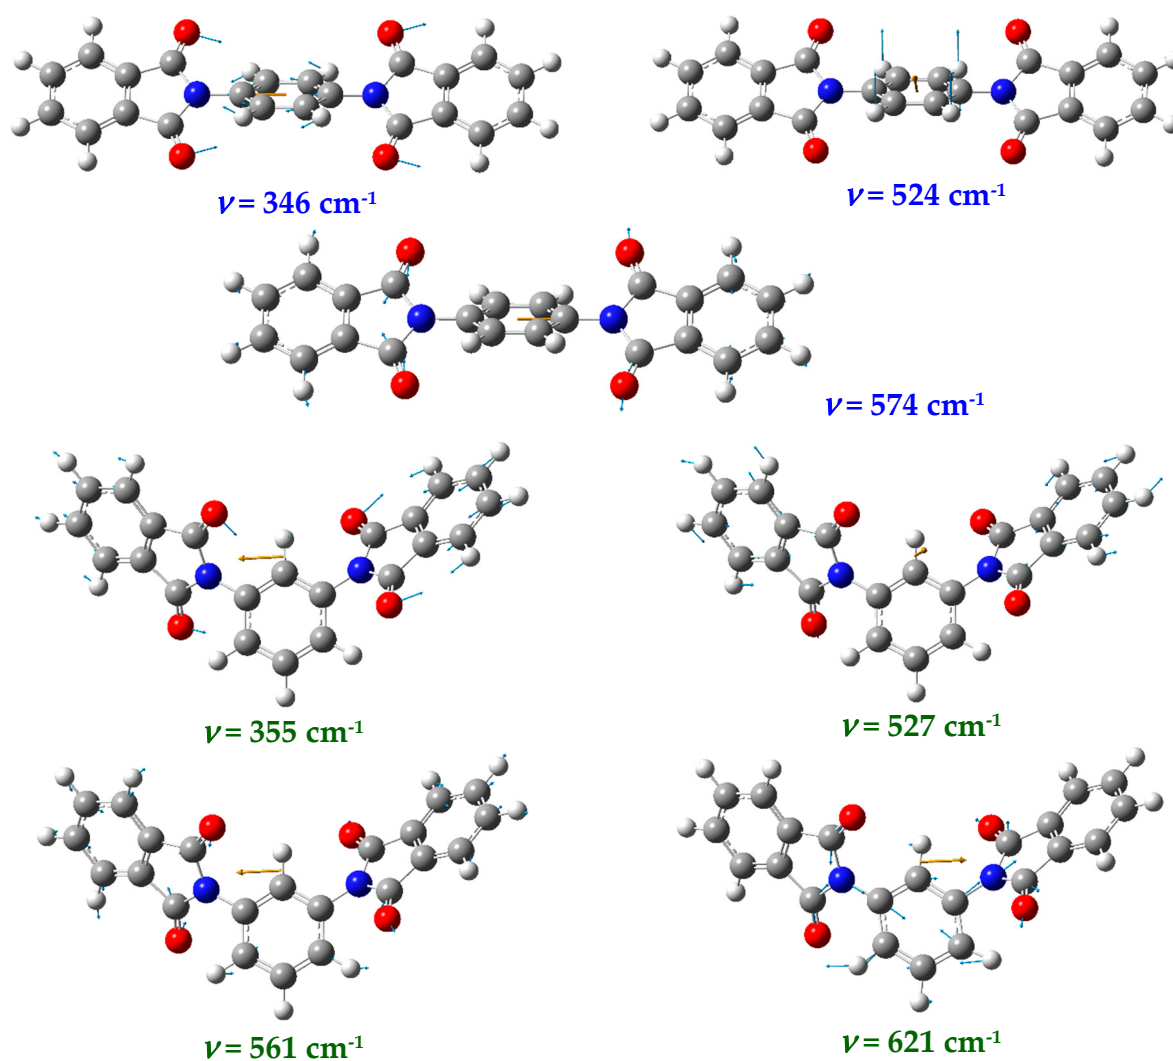

**Figure S5.** Calculated vibration modes of representative far-IR absorption peaks of the models depicted in Fig. S4.
